# Supplementary material for: The Prevalence and Diagnostic Ratio of Familial Hypercholesterolemia (FH) and Proportion of Acute Coronary Syndrome in Japanese FH Patients in a Healthcare Record Database Study
Source: Hindawi journal article supplement (doi:10.1155/2020/5936748), 2020-06-19
Supplement: f1 [file 5936748.f1.pdf]

## Supplementary materials

TABLE 1: LDL-C levels in patients with comorbid ACS

| LDL-C categories, n (%)                            | Definite FH   |                  | Suspected FH  |                   | Overall FH    |                   |
|----------------------------------------------------|---------------|------------------|---------------|-------------------|---------------|-------------------|
|                                                    | LLD<br>(n=45) | Non-LLD<br>(n=8) | LLD<br>(n=15) | Non-LLD<br>(n=16) | LLD<br>(n=60) | Non-LLD<br>(n=24) |
| Female sex, n (%)                                  | 15 (33.3)     | 1 (12.5)         | 5 (33.3)      | 8 (50.0)          | 20 (33.3)     | 9 (37.5)          |
| Median age, years (IQR)                            | 63.0 (20.0)   | 68.5 (23.0)      | 59.0 (18.0)   | 68.5 (16.5)       | 62.0 (20.0)   | 68.5 (19.5)       |
| LDL-C categories, n (%)                            |               |                  |               |                   |               |                   |
| <1.8 mmol/L (<70 mg/dL)                            | 6 (13.3)      | 0                | 0             | 0                 | 6 (10.0)      | 0                 |
| 1.8 to <2.6 mmol/L (70 to <100 mg/dL)              | 9 (20.0)      | 2 (25.0)         | 1 (6.7%)      | 0                 | 10 (16.7)     | 2 (8.3)           |
| 2.6 to <3.6 mmol/L (100 to <140 mg/dL)             | 18 (40.0)     | 5 (62.5)         | 0             | 0                 | 18 (30.0)     | 5 (20.8)          |
| 3.6 to <4.7 mmol/L (140 to <180 mg/dL)             | 4 (8.9)       | 1 (12.5)         | 2 (13.3)      | 0                 | 6 (10.0)      | 1 (4.2)           |
| ≥4.7 mmol/L (≥180 mg/dL)                           | 8 (17.8)      | 0                | 12 (80.0)     | 16 (100.0)        | 20 (33.3)     | 16 (66.7)         |
| No LDL-C data within 90 days before the index date | 4 (8.9)       | 0                | 2 (13.3)      | 1 (6.3)           | 6 (10.0)      | 1 (4.2)           |

ACS = acute coronary syndrome; FH = familial hypercholesterolemia; IQR = interquartile range; LDL-C = low-density lipoprotein cholesterol; LLD = lipid-lowering drugs

TABLE 2: LDL-C levels in patients with comorbid ACS separated by sex

| LDL-C categories, n (%)                            | Definite FH       |                 |                      |                    | Suspected FH     |                 |                      |                    | Overall FH        |                 |                      |                     |
|----------------------------------------------------|-------------------|-----------------|----------------------|--------------------|------------------|-----------------|----------------------|--------------------|-------------------|-----------------|----------------------|---------------------|
|                                                    | LLD female (n=15) | LLD male (n=30) | Non-LLD female (n=1) | Non-LLD male (n=7) | LLD female (n=5) | LLD male (n=10) | Non-LLD female (n=8) | Non-LLD male (n=8) | LLD female (n=20) | LLD male (n=40) | Non-LLD female (n=9) | Non-LLD male (n=15) |
| Female sex, n (%)                                  | 15 (100)          | 0               | 1 (100)              | 0                  | 5 (100)          | 0               | 8 (100)              | 0                  | 20 (100)          | 0               | 9 (100)              | 0                   |
| Median age, years (IQR)                            | 64.0 (21.0)       | 62.0 (22.0)     | 77.0 (NA)            | 65.0 (24.0)        | 66.0 (10.0)      | 57.0 (12.0)     | 68.5 (10.0)          | 64.0 (23.0)        | 65.0 (18.0)       | 59.5 (18.0)     | 69.0 (12.0)          | 65.0 (24.0)         |
| LDL-C categories, n (%)                            |                   |                 |                      |                    |                  |                 |                      |                    |                   |                 |                      |                     |
| 1.8 to <2.6 mmol/L (70 to <100 mg/dL)              | 1 (6.7)           | 8 (26.7)        | 1 (100.0)            | 1 (14.3)           | 0                | 1 (10.0)        | 0                    | 0                  | 1 (5.0)           | 9 (22.5)        | 1 (11.1)             | 1 (6.7)             |
| 2.6 to <3.6 mmol/L (100 to <140 mg/dL)             | 9 (60.0)          | 9 (30.0)        | 0                    | 5 (71.4)           | 0                | 0               | 0                    | 0                  | 9 (45.0)          | 9 (22.5)        | 0                    | 5 (33.3)            |
| 3.6 to <4.7 mmol/L (140 to <180 mg/dL)             | 2 (13.3)          | 2 (6.7)         | 0                    | 1 (14.3)           | 1 (20.0)         | 1 (10.0)        | 0                    | 0                  | 3 (15.0)          | 3 (7.5)         | 0                    | 1 (6.7)             |
| ≥4.7 mmol/L (≥180 mg/dL)                           | 2 (13.3)          | 6 (20.0)        | 0                    | 0                  | 4 (80.0)         | 8 (80.0)        | 8 (100.0)            | 8 (100.0)          | 6 (30.0)          | 14 (35.0)       | 8 (88.9)             | 8 (53.3)            |
| No LDL-C data within 90 days before the index date | 2 (13.3)          | 2 (6.7)         | 0                    | 0                  | 0                | 2 (20.0)        | 1 (12.5)             | 0                  | 2 (10.0)          | 4 (10.0)        | 1 (11.1)             | 0                   |

ACS = acute coronary syndrome; FH = familial hypercholesterolemia; IQR = interquartile range; LDL-C = low-density lipoprotein cholesterol; LLD = lipid-lowering drugs; NA=not applicable

TABLE 3: LDL-C levels in patients with comorbid ACS separated by age (<65 or ≥65 years)

| LDL-C categories, n (%)                            | Definite FH         |                     |                        |                        | Suspected FH        |                    |                        |                        | Overall FH          |                     |                         |                         |
|----------------------------------------------------|---------------------|---------------------|------------------------|------------------------|---------------------|--------------------|------------------------|------------------------|---------------------|---------------------|-------------------------|-------------------------|
|                                                    | LLD age <65y (n=26) | LLD age ≥65y (n=19) | Non-LLD age <65y (n=3) | Non-LLD age ≥65y (n=5) | LLD age <65y (n=11) | LLD age ≥65y (n=4) | Non-LLD age <65y (n=7) | Non-LLD age ≥65y (n=9) | LLD age <65y (n=37) | LLD age ≥65y (n=23) | Non-LLD age <65y (n=10) | Non-LLD age ≥65y (n=14) |
| Female sex, n (%)                                  | 8 (30.8)            | 7 (36.8)            | 0                      | 1 (20.0)               | 2 (11.8)            | 3 (75.0)           | 3 (42.9)               | 5(55.6)                | 10 (27.0)           | 10 (43.5)           | 3 (30.0)                | 6 (42.9)                |
| Median age, years (IQR)                            | 54.0 (11.0)         | 75.0 (7.0)          | 55.0 (5.0)             | 77.0 (7.0)             | 57.0 (12.0)         | 70.5 (9.5)         | 57.0 (12.0)            | 73.0 (6.0)             | 55.0 (12.0)         | 74.0 (7.0)          | 55.0 (8.0)              | 74.0 (9.0)              |
| LDL-C categories, n (%)                            |                     |                     |                        |                        |                     |                    |                        |                        |                     |                     |                         |                         |
| 1.8 to <2.6 mmol/L (70 to <100 mg/dL)              | 3 (11.5)            | 6 (31.6)            | 0                      | 2 (40.0)               | 1 (9.1)             | 0                  | 0                      | 0                      | 4 (10.8)            | 6 (26.1)            | 0                       | 2 (14.3)                |
| 2.6 to <3.6 mmol/L (100 to <140 mg/dL)             | 10 (38.5)           | 8 (42.1)            | 3 (100.0)              | 2 (40.0)               | 0                   | 0                  | 0                      | 0                      | 10 (27.0)           | 8 (34.8)            | 3 (30.0)                | 2 (14.3)                |
| 3.6 to <4.7 mmol/L (140 to <180 mg/dL)             | 2 (7.7)             | 2 (10.5)            | 0                      | 1 (20.0)               | 2 (18.2)            | 0                  | 0                      | 0                      | 4 (10.8)            | 2 (8.7)             | 0                       | 1 (7.1)                 |
| ≥4.7 mmol/L (≥180 mg/dL)                           | 7 (26.9)            | 1 (5.3)             | 0                      | 0                      | 8 (72.7)            | 4 (100.0)          | 7 (100.0)              | 9 (100.0)              | 15 (40.5)           | 5 (21.7)            | 7 (70.0)                | 9 (64.3)                |
| No LDL-C data within 90 days before the index date | 2 (7.7)             | 2 (10.5)            | 0                      | 0                      | 2 (18.2)            | 0                  | 0                      | 1 (11.1)               | 4 (10.8)            | 2 (8.7)             | 0                       | 1 (7.1)                 |

ACS = acute coronary syndrome; FH = familial hypercholesterolemia; IQR = interquartile range; LDL-C = low-density lipoprotein cholesterol; LLD = lipid-lowering drugs

TABLE 4: LDL-C levels in patients without comorbid ACS

| LDL-C categories, n (%)                            | Definite FH    |                   | Suspected FH   |                    | Overall FH     |                    |
|----------------------------------------------------|----------------|-------------------|----------------|--------------------|----------------|--------------------|
|                                                    | LLD<br>(n=169) | Non-LLD<br>(n=77) | LLD<br>(n=122) | Non-LLD<br>(n=380) | LLD<br>(n=291) | Non-LLD<br>(n=457) |
| Female sex, n (%)                                  | 93 (55.0)      | 37 (48.1)         | 78 (63.9)      | 209 (55.0)         | 171 (58.8)     | 246 (53.8)         |
| Median age, years (IQR)                            | 61.0 (18.0)    | 58.0 (17.0)       | 59.0 (18.0)    | 59.0 (22.5)        | 60.0 (18.0)    | 59.0 (21.0)        |
| LDL-C categories, n (%)                            |                |                   |                |                    |                |                    |
| 1.8 to <2.6 mmol/L (70 to <100 mg/dL)              | 39 (23.1)      | 15 (19.5)         | 4 (3.3)        | 4 (1.1)            | 43 (14.8)      | 19 (4.2)           |
| 2.6 to <3.6 mmol/L (100 to <140 mg/dL)             | 61 (36.1)      | 26 (33.8)         | 15 (12.3)      | 12 (3.2)           | 76 (26.1)      | 38 (8.3)           |
| 3.6 to <4.7 mmol/L (140 to <180 mg/dL)             | 26 (15.4)      | 15 (19.5)         | 13 (10.7)      | 16 (4.2)           | 39 (13.4)      | 31 (6.8)           |
| ≥4.7 mmol/L (≥180 mg/dL)                           | 29 (17.2)      | 15 (19.5)         | 87 (71.3)      | 347 (91.3)         | 116 (39.9)     | 362 (79.2)         |
| No LDL-C data within 90 days before the index date | 45 (26.6)      | 8 (10.4)          | 31 (25.4)      | 31 (8.2)           | 76 (26.1)      | 39 (8.5)           |

ACS = acute coronary syndrome; FH = familial hypercholesterolemia; IQR = interquartile range; LDL-C = low-density lipoprotein cholesterol; LLD = lipid-lowering drugs

TABLE 5: LDL-C levels in patients without comorbid ACS separated by sex

| LDL-C categories, n (%)                            | Definite FH       |                 |                       |                     | Suspected FH      |                 |                        |                      | Overall FH         |                  |                        |                      |
|----------------------------------------------------|-------------------|-----------------|-----------------------|---------------------|-------------------|-----------------|------------------------|----------------------|--------------------|------------------|------------------------|----------------------|
|                                                    | LLD female (n=93) | LLD male (n=76) | Non-LLD female (n=37) | Non-LLD male (n=40) | LLD female (n=78) | LLD male (n=44) | Non-LLD female (n=209) | Non-LLD male (n=171) | LLD female (n=171) | LLD male (n=120) | Non-LLD female (n=246) | Non-LLD male (n=211) |
| Female sex, n (%)                                  | 93 (100)          | 0               | 37 (100)              | 0                   | 78 (100)          | 0               | 209 (100)              | 0                    | 171 (100)          | 0                | 246 (100)              | 0                    |
| Median age, years (IQR)                            | 62.0 (17.0)       | 59.5 (18.5)     | 61.0 (15.0)           | 58.0 (18.0)         | 61.0 (13.0)       | 50.0 (21.0)     | 60.0 (22.0)            | 57.0 (24.0)          | 62.0 (16.0)        | 57.0 (22.0)      | 60.0 (21.0)            | 57.0 (21.0)          |
| LDL-C categories, n (%)                            |                   |                 |                       |                     |                   |                 |                        |                      |                    |                  |                        |                      |
| 1.8 to <2.6 mmol/L (70 to <100 mg/dL)              | 16 (17.2)         | 23 (30.3)       | 5 (13.5)              | 10 (25.0)           | 2 (2.6)           | 2 (4.5)         | 2 (1.0)                | 2 (1.2)              | 18 (10.5)          | 25 (20.8)        | 7 (2.8)                | 12 (5.7)             |
| 2.6 to <3.6 mmol/L (100 to <140 mg/dL)             | 35 (37.6)         | 26 (34.2)       | 12 (32.4)             | 14 (35.0)           | 11 (14.1)         | 4 (9.1)         | 8 (3.8)                | 4 (2.3)              | 46 (26.9)          | 30 (25.0)        | 20 (8.1)               | 18 (8.5)             |
| 3.6 to <4.7 mmol/L (140 to <180 mg/dL)             | 16 (17.2)         | 10 (13.2)       | 13 (35.1)             | 2 (5.0)             | 9 (11.5)          | 4 (9.1)         | 9 (4.3)                | 7 (4.1)              | 25 (14.6)          | 14 (11.7)        | 22 (8.9)               | 9 (4.3)              |
| ≥4.7 mmol/L (≥180 mg/dL)                           | 20 (21.5)         | 9 (11.8)        | 6 (16.2)              | 9 (22.5)            | 55 (70.5)         | 32 (72.7)       | 190 (90.9)             | 157 (91.8)           | 75 (43.9)          | 41 (34.2)        | 196 (79.7)             | 166 (78.7)           |
| No LDL-C data within 90 days before the index date | 27 (29.0)         | 18 (23.7)       | 5 (13.5)              | 3 (7.5)             | 23 (29.5)         | 8 (18.2)        | 17 (8.1)               | 14 (8.2)             | 50 (29.2)          | 26 (21.7)        | 22 (8.9)               | 17 (8.1)             |

ACS = acute coronary syndrome; FH = familial hypercholesterolemia; IQR = interquartile range; LDL-C = low-density lipoprotein cholesterol; LLD = lipid-lowering drugs

TABLE 6: LDL-C levels in patients without comorbid ACS separated by age (<65 or ≥65 years)

| LDL-C categories, n (%)                            | Definite FH        |                   |                       |                       | Suspected FH      |                   |                        |                        | Overall FH         |                    |                        |                        |
|----------------------------------------------------|--------------------|-------------------|-----------------------|-----------------------|-------------------|-------------------|------------------------|------------------------|--------------------|--------------------|------------------------|------------------------|
|                                                    | LLD age<65 (n=100) | LLD age≥65 (n=69) | Non-LLD age<65 (n=53) | Non-LLD age≥65 (n=24) | LLD age<65 (n=80) | LLD age≥65 (n=42) | Non-LLD age<65 (n=239) | Non-LLD age≥65 (n=141) | LLD age<65 (n=180) | LLD age≥65 (n=111) | Non-LLD age<65 (n=292) | Non-LLD age≥65 (n=165) |
| Female sex, n (%)                                  | 51 (51.0)          | 42 (60.9)         | 25 (47.2)             | 12 (50.0)             | 47 (58.8)         | 31 (73.8)         | 121 (50.6)             | 88 (62.4)              | 98 (54.4)          | 73 (65.8)          | 146 (50.0)             | 100 (60.6)             |
| Median age, years (IQR)                            | 53.0 (14.5)        | 71.0 (7.0)        | 55.0 (15.0)           | 70.5 (8.0)            | 54.0 (14.5)       | 72.0 (7.0)        | 50.0 (18.0)            | 72.0 (9.0)             | 53.0 (14.0)        | 71.0 (7.0)         | 51.0 (17.5)            | 72.0 (8.0)             |
| LDL-C categories, n (%)                            |                    |                   |                       |                       |                   |                   |                        |                        |                    |                    |                        |                        |
| 1.8 to <2.6 mmol/L (70 to <100 mg/dL)              | 17 (17.0)          | 22 (31.9)         | 11 (20.8)             | 4 (16.7)              | 1 (1.3)           | 3 (7.1)           | 1 (0.4)                | 3 (2.1)                | 18 (10.0)          | 25 (22.5)          | 12 (4.1)               | 7 (4.2)                |
| 2.6 to <3.6 mmol/L (100 to <140 mg/dL)             | 39 (39.0)          | 22 (31.9)         | 16 (30.2)             | 10 (41.7)             | 10 (12.5)         | 5 (11.9)          | 6 (2.5)                | 6 (4.3)                | 49 (27.2)          | 27 (24.3)          | 22 (7.5)               | 16 (9.7)               |
| 3.6 to <4.7 mmol/L (140 to <180 mg/dL)             | 12 (12.0)          | 14 (20.3)         | 9 (17.0)              | 6 (25.0)              | 8 (10.0)          | 5 (11.9)          | 7 (2.9%)               | 9 (6.4)                | 20 (11.1)          | 19 (17.1)          | 16 (5.5)               | 15 (9.1)               |
| ≥4.7 mmol/L (≥180 mg/dL)                           | 23 (23.0)          | 6 (8.7)           | 14 (26.4)             | 1 (4.2)               | 59 (73.8)         | 28 (66.7)         | 224 (93.7)             | 123 (87.2)             | 82 (45.6)          | 34 (30.6)          | 238 (81.5)             | 124 (75.2)             |
| No LDL-C data within 90 days before the index date | 25 (25.0)          | 20 (29.0)         | 5 (9.4)               | 3 (12.5)              | 17 (21.3)         | 14 (33.3)         | 21 (8.8)               | 10 (7.1)               | 42 (23.3)          | 34 (30.6)          | 26 (8.9)               | 13 (7.9)               |

ACS = acute coronary syndrome; FH = familial hypercholesterolemia; IQR = interquartile range; LDL-C = low-density lipoprotein cholesterol; LLD = lipid-lowering drugs

FIGURE 1: *Comorbid ACS and Hospitalization for ACS Assessment Periods*

Comorbidities include acute coronary syndrome (ACS), coronary artery disease (CAD), hypertension, diabetes mellitus (DM), non-cardiogenic stroke, peripheral artery disease (PAD) and diabetic microangiopathy.

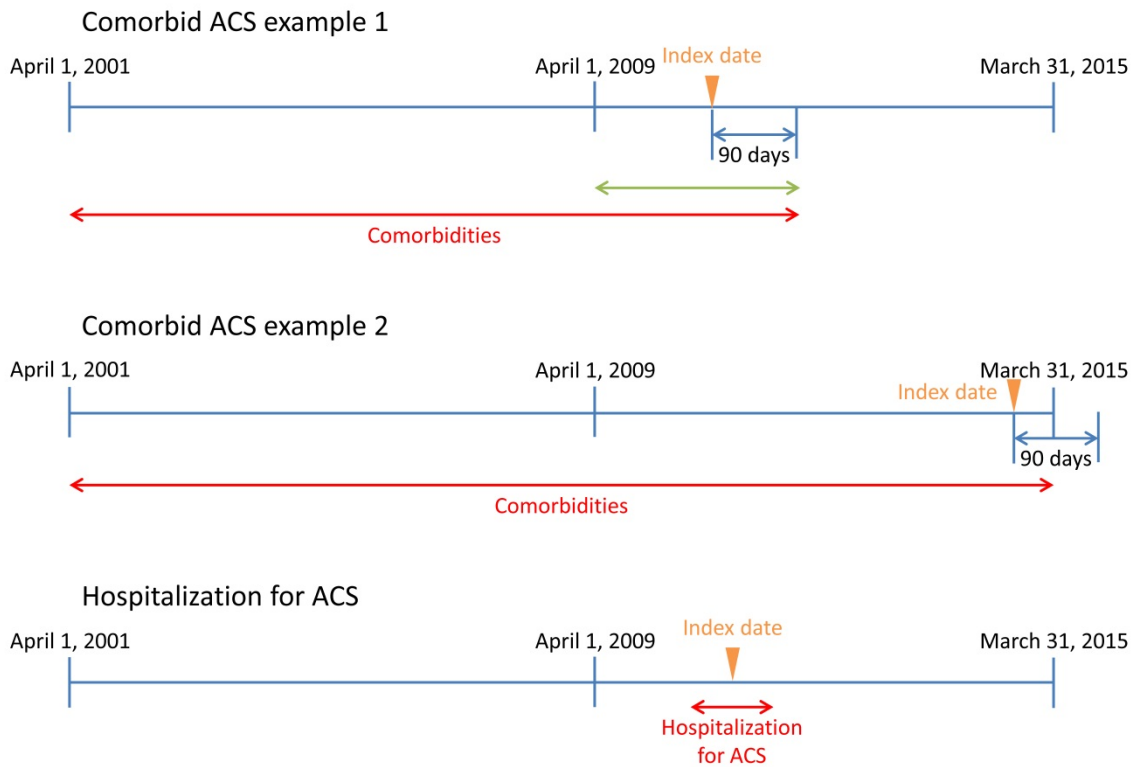

Comorbidities (ACS, CAD, hypertension, DM, non-cardiogenic stroke, PAD and diabetic microangiopathy)
